# Supplementary material for: Adaptation and validation of the Polish version of the Beliefs about Medicines Questionnaire among cardiovascular patients and medical students
Source: PubMed Central journal article supplement (PMC7153860; doi:10.1371/journal.pone.0230131), 2020-04-13
Supplement: pone.0230131.s004.pdf [file pone.0230131.s004.pdf]

**S1 Table. Pearson's r and Spearman's rho coefficients for the associations.** Each row presents results of association between Variable 1 and Variable 2 in a given group of patients

| Group                                                                                | Variable 1 | Variable 2 | Parametric test |         | Non-parametric test |         | Is statistical conclusion consistent? |
|--------------------------------------------------------------------------------------|------------|------------|-----------------|---------|---------------------|---------|---------------------------------------|
|                                                                                      |            |            | Pearson's r     | P-value | Spearman's rho      | P-value |                                       |
| Association between the BMQ-PL subscales                                             |            |            |                 |         |                     |         |                                       |
| Inp.                                                                                 | SN         | SC         | 0.0143          | 0.89    | 0.0595              | 0.55    | Yes                                   |
| Inp.                                                                                 | SN         | GO         | -0.2822         | 0.0041  | -0.2517             | 0.011   | Yes                                   |
| Inp.                                                                                 | SN         | GH         | -0.2793         | 0.0045  | -0.1700             | 0.088   | No                                    |
| Inp.                                                                                 | SC         | GO         | 0.4404          | <0.0001 | 0.3710              | 0.0001  | Yes                                   |
| Inp.                                                                                 | SC         | GH         | 0.3890          | <0.0001 | 0.3716              | 0.0001  | Yes                                   |
| Inp.                                                                                 | GO         | GH         | 0.5301          | <0.0001 | 0.4579              | <0.0001 | Yes                                   |
| Outp.                                                                                | SN         | SC         | 0.0751          | 0.47    | 0.0453              | 0.66    | Yes                                   |
| Outp.                                                                                | SN         | GO         | -0.0903         | 0.38    | -0.0711             | 0.49    | Yes                                   |
| Outp.                                                                                | SN         | GH         | -0.0864         | 0.40    | -0.1542             | 0.13    | Yes                                   |
| Outp.                                                                                | SC         | GO         | 0.3965          | <0.0001 | 0.3776              | 0.0001  | Yes                                   |
| Outp.                                                                                | SC         | GH         | 0.4441          | <0.0001 | 0.4090              | <0.0001 | Yes                                   |
| Outp.                                                                                | GO         | GH         | 0.6109          | <0.0001 | 0.5388              | <0.0001 | Yes                                   |
| Stud.                                                                                | SN         | SC         | 0.1753          | 0.071   | 0.1523              | 0.12    | Yes                                   |
| Stud.                                                                                | SN         | GO         | -0.0525         | 0.59    | -0.0685             | 0.49    | Yes                                   |
| Stud.                                                                                | SN         | GH         | -0.1321         | 0.18    | -0.1034             | 0.29    | Yes                                   |
| Stud.                                                                                | SC         | GO         | 0.3051          | 0.0015  | 0.3349              | 0.0004  | Yes                                   |
| Stud.                                                                                | SC         | GH         | 0.2821          | 0.0034  | 0.2519              | 0.0092  | Yes                                   |
| Stud.                                                                                | GO         | GH         | 0.4469          | <0.0001 | 0.4370              | <0.0001 | Yes                                   |
| Raw association of the BMQ-PL subscales with self-reported measure of drug adherence |            |            |                 |         |                     |         |                                       |
| Inp.                                                                                 | ARMS       | SN         | -0.0376         | 0.71    | -0.1299             | 0.19    | Yes                                   |
| Inp.                                                                                 | ARMS       | SC         | -0.2062         | 0.038   | -0.1850             | 0.063   | No                                    |
| Inp.                                                                                 | ARMS       | SN-SC      | 0.1351          | 0.18    | 0.0695              | 0.49    | Yes                                   |
| Inp.                                                                                 | ARMS       | GO         | 0.0764          | 0.45    | 0.1215              | 0.22    | Yes                                   |
| Inp.                                                                                 | ARMS       | GH         | -0.1101         | 0.27    | -0.0005             | 1.0     | Yes                                   |
| Outp.                                                                                | ARMS       | SN         | 0.2871          | 0.0053  | 0.2498              | 0.016   | Yes                                   |
| Outp.                                                                                | ARMS       | SC         | -0.2370         | 0.024   | -0.2145             | 0.041   | Yes                                   |
| Outp.                                                                                | ARMS       | SN-SC      | 0.3965          | 0.0001  | 0.4135              | <0.0001 | Yes                                   |
| Outp.                                                                                | ARMS       | GO         | -0.2664         | 0.0091  | -0.3033             | 0.0028  | Yes                                   |
| Outp.                                                                                | ARMS       | GH         | -0.3009         | 0.0030  | -0.2878             | 0.0047  | Yes                                   |
| Association between the BMQ-PL subscales and the number of medications used          |            |            |                 |         |                     |         |                                       |
| All                                                                                  | Med.       | SN         | 0.3312          | <0.0001 | 0.3137              | <0.0001 | Yes                                   |
| All                                                                                  | Med.       | SC         | 0.3217          | <0.0001 | 0.3137              | <0.0001 | Yes                                   |
| All                                                                                  | Med.       | GO         | 0.0088          | 0.88    | 0.0134              | 0.82    | Yes                                   |
| All                                                                                  | Med.       | GH         | 0.1887          | 0.0012  | 0.1975              | 0.0007  | Yes                                   |

Inp. – Inpatients

Outp. – Outpatients

Stud. – Medical students

ARMS – self-reported measure of drug adherence assessed with Polish version of Adherence to Refills and Medications Scale

SN – *Specific-Necessity* subscale

SC – *Specific-Concerns* subscale

SN-SC – difference between *Specific-Necessity* and *Specific-Concerns* subscales

GO – *General-Overuse* subscale

GH – *General-Harm* subscale
